# Supplementary material
Source: Research Square preprint supplement (doi:10.21203/rs.3.rs-8761917/v1)
Supplement: Supplementary file 1 [file 7ea01ae4dc92e7780b40be8b.docx]

Supplementary Material

**Magnetically Actuated Helical Microrobots Enabling Ultrasound-Free Precision Fragmentation of Lens Nuclei in Cataract Surgery**

*Li Zhelin1,2, Wei yingying1, Tang qiongyan1, Song weitao2，Fan xinjian3*, Lin ding1**

Correspondence: Fan xinjian (xinjianfan@suda.edu.cn) or Lin Ding ([linding@csu.edu.cn](mailto:linding@csu.edu.cn))

1Changsha Aier Eye Hospital, Aier School of Ophthalmology, Central South University, Changsha, Hunan, China.

2 The Xiangya Hospital, Central South University, Changsha, Hunan, China.

3Jiangsu Provincial Key Laboratory of Advanced Robotics, School of Mechanical and Electric Engineering, Soochow University, Suzhou, 215123 China


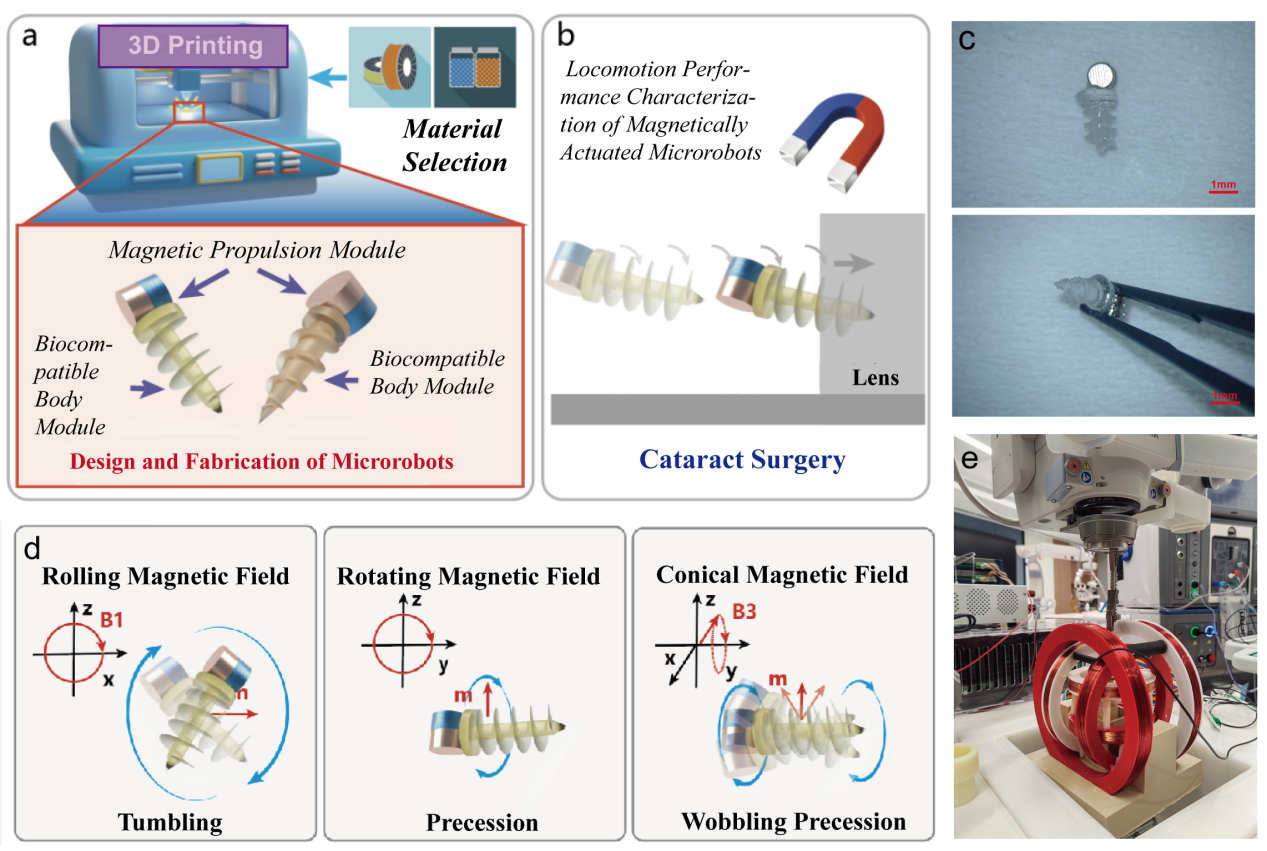


**Figure S1** The photo of the electromagnetic coil platform.


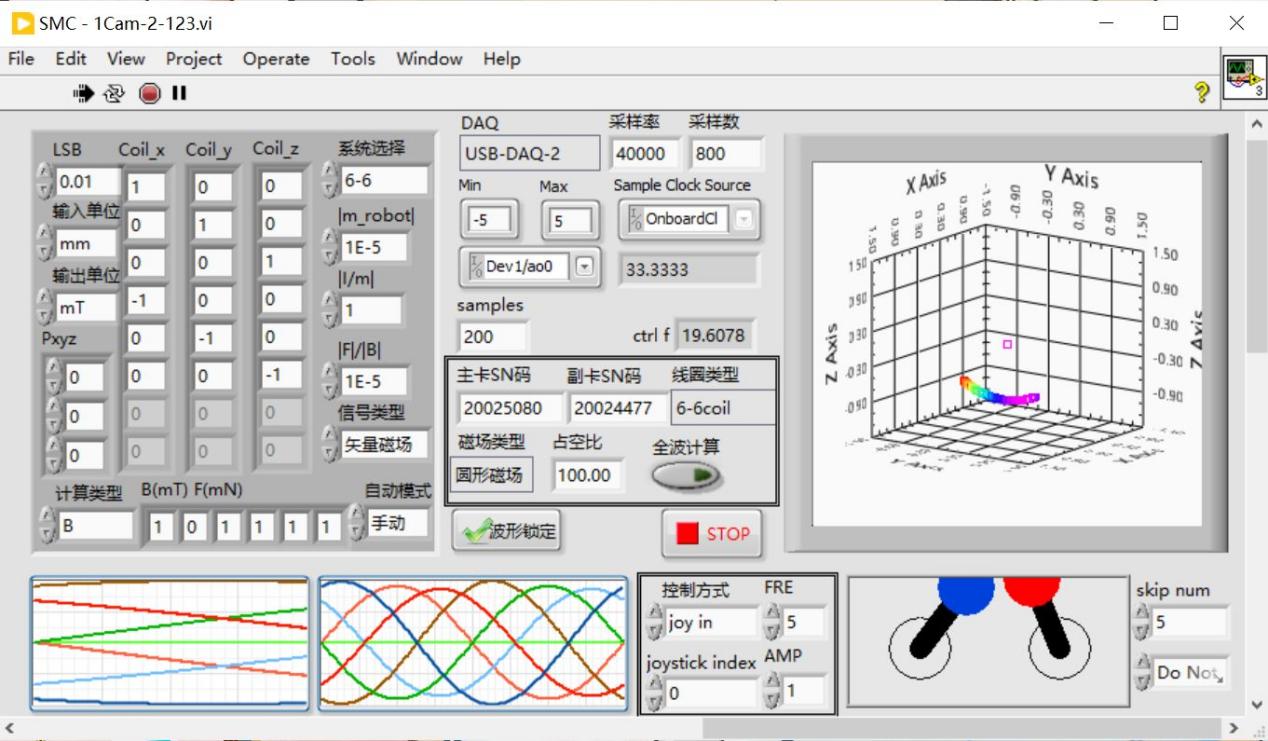


**Figure S2** The photo of the three-dimensional motion control program interface.


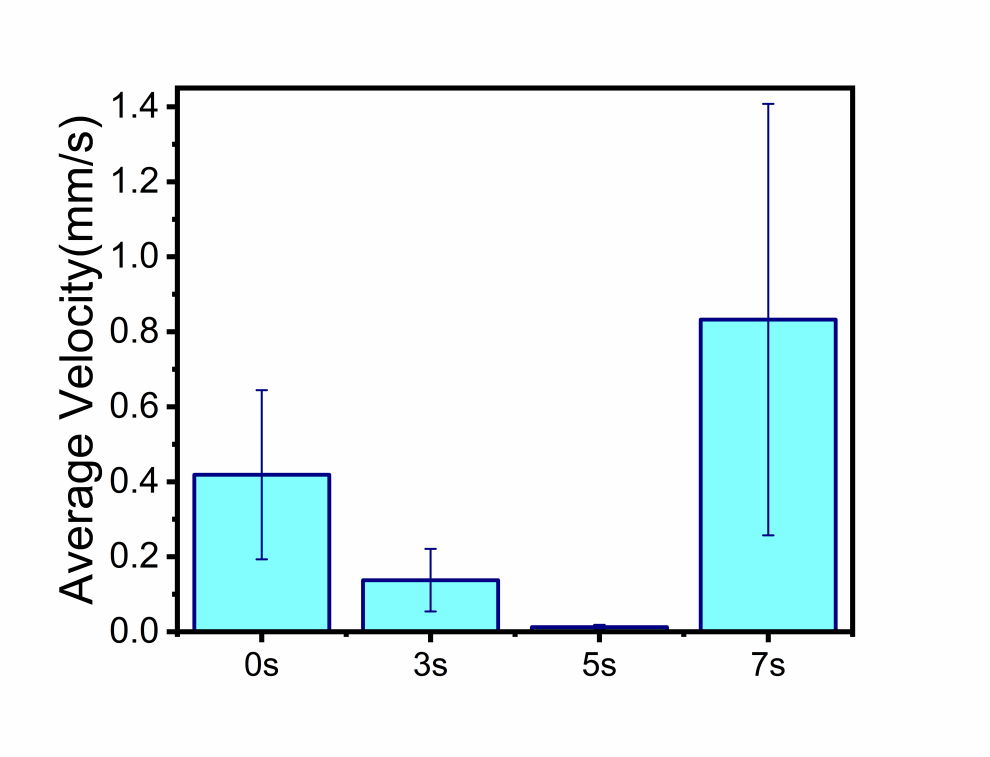


**Figure S3 The cutting movement speed of the Helixbot in porcine lenses.**


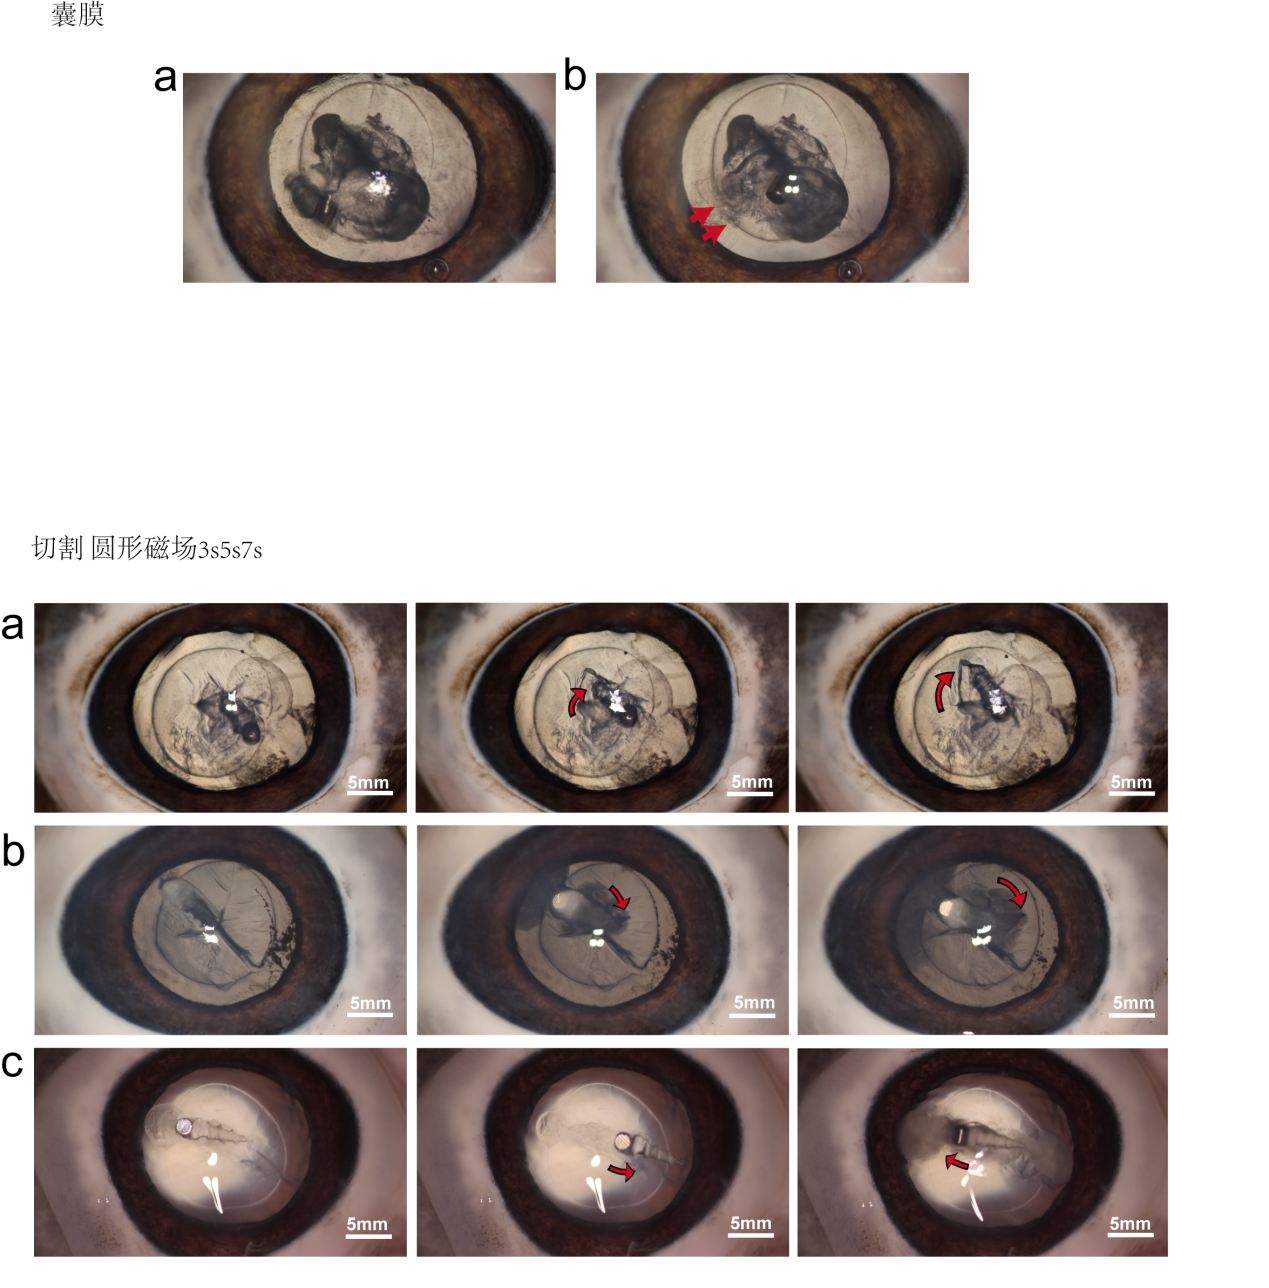


**Figure S4** **Lens segmentation by helixbot across cataract severity grades under microwave exposure** **a** Helixbot performing cutting operations in the lens with mild cataract (3-second microwave exposure); **b** Helixbot performing cutting operations in the lens with moderate cataract (5-second microwave exposure); **c** Helixbot performing cutting operations in the lens with severe cataract (7-second microwave exposure)


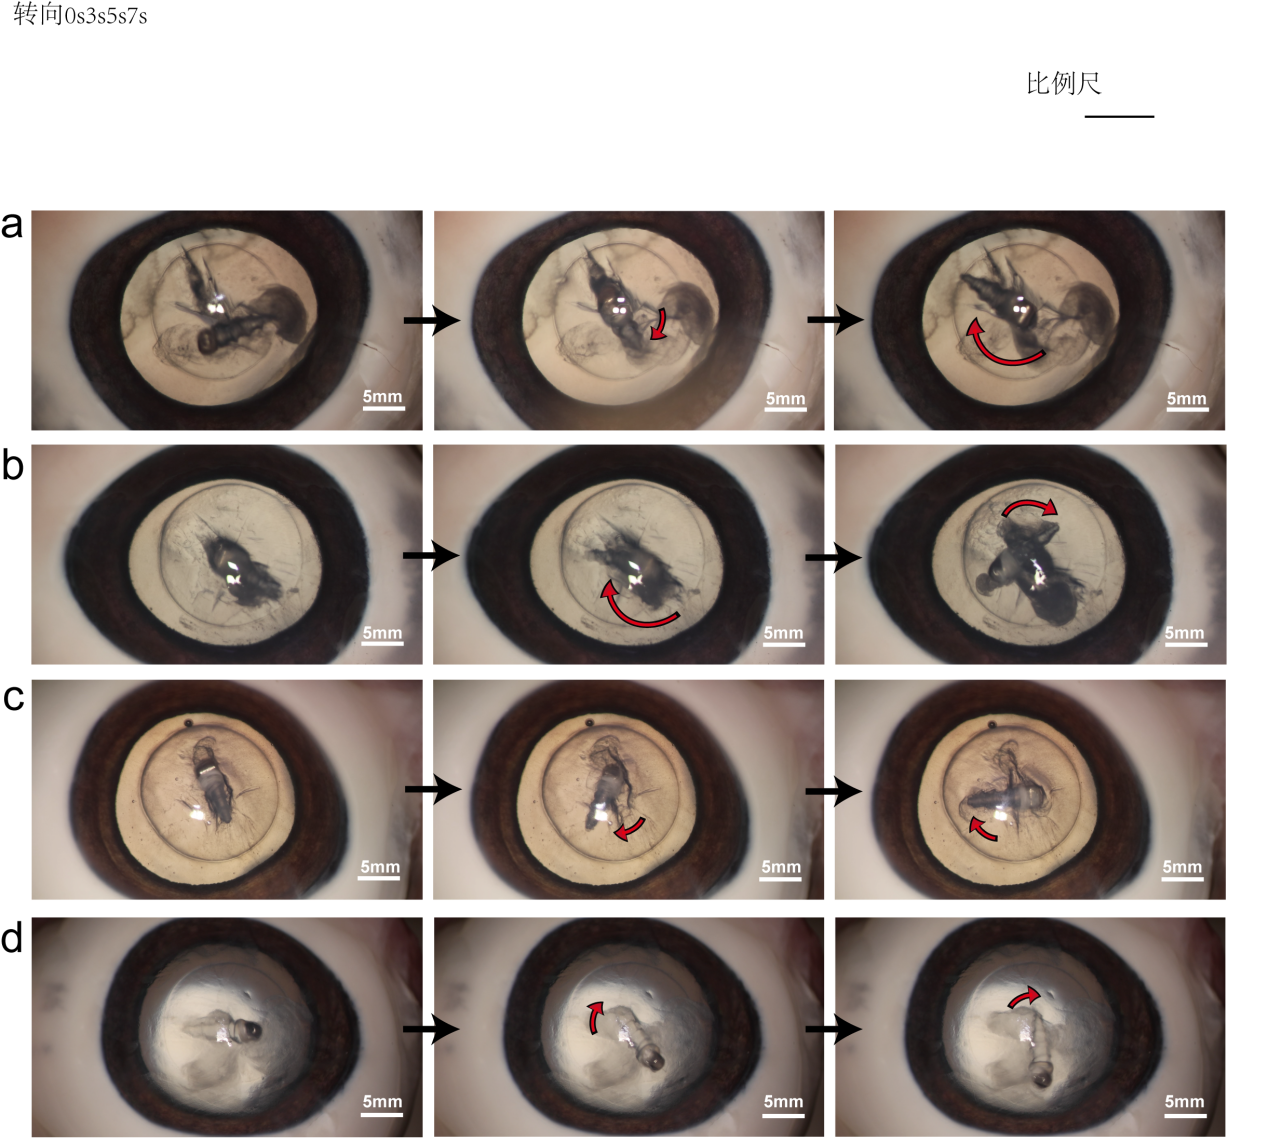


**Figure S5** **Investigation of helixbot rotational characteristic across different Grades of cataract severity** **a** Helixbot executing rotational maneuvers within untreated lens; **b** Helixbot executing rotational maneuvers within mild-grade cataract lens (3-second microwave exposure); **c** Helixbot executing rotational maneuvers within moderate-grade cataract lens (5-second microwave exposure); **d** Helixbot executing rotational maneuvers within severe-grade cataract lens (7-second microwave exposure)


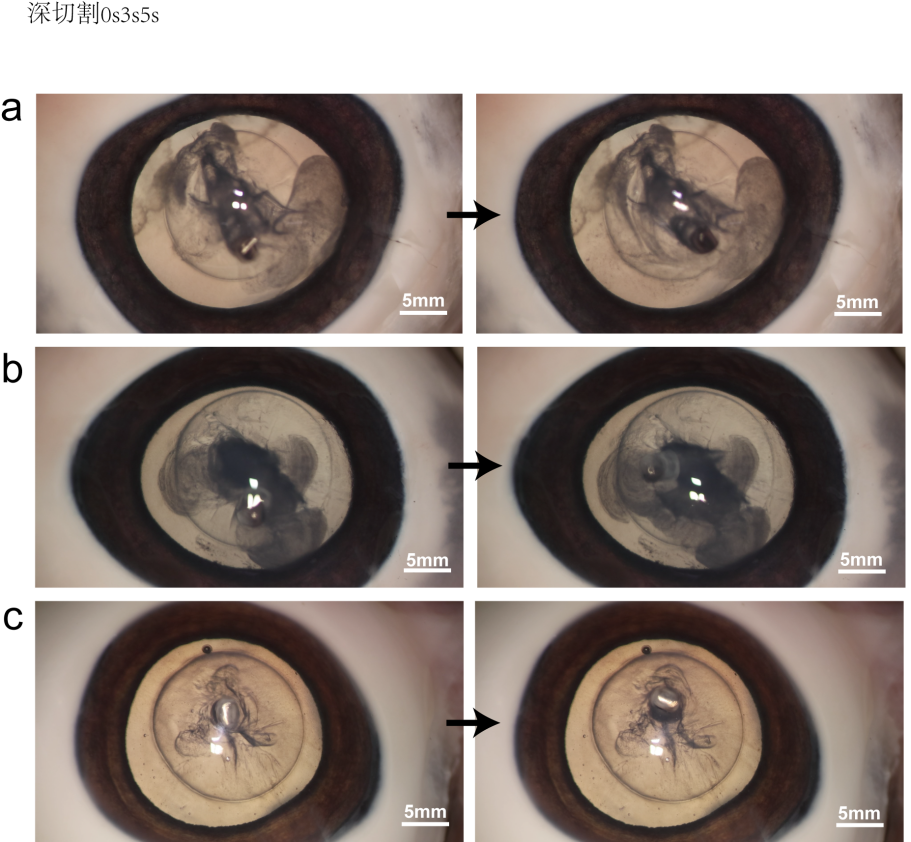


**Figure S6** **Helixbot-mediated deep intranuclear segmentation** **a** Helixbot executing deep segmentation within mild-grade cataract in porcine lens (3-second microwave exposure); **b** Helixbot executing deep segmentation within moderate-grade cataract in porcine lens (5-second microwave exposure); **c** Helixbot executing deep segmentation within severe-grade cataract in porcine lens (7-second microwave exposure);
